# Supplementary material for: In vitro formation and characterization of a perfusable three-dimensional tubular capillary network in microfluidic devices
Source: Royal Society of Chemistry journal article supplement (doi:10.1039/c2lc40131b), 2012-01-01
Supplement: c2lc40131b.pdf [file c2lc40131b.pdf]

Supplementary Material (ESI) for Lab on a Chip  
This journal is © The Royal Society of Chemistry 2012

# ***In vitro* formation and characterization of a perfusable three-dimensional tubular capillary network in microfluidic devices**

**Ju Hun Yeon<sup>a</sup>, Hyun Ryul Ryu<sup>a,b</sup>, Min Hwan Chung<sup>a</sup>, Qing Ping Hu<sup>a</sup>, Noo Li Jeon<sup>a,b,\*</sup>**

<sup>a</sup> *School of Mechanical and Aerospace Engineering, Seoul National University, Seoul, 151-744, Korea.*

<sup>b</sup> *World Class University (WCU) Program on Multiscale Mechanical Design, Seoul National University,  
Korea*

\* Corresponding author

School of Mechanical and Aerospace Engineering, Seoul National University, Seoul, 151-744, Korea

Tel: +82-2-880-7111; fax: +82-2-880-7119

E-mail address: njeon@snu.ac.kr

Supplementary Material (ESI) for Lab on a Chip  
This journal is © The Royal Society of Chemistry 2012

**Fig. S1** The movie clip about the capillary tube formation on the device shows the whole process of vascular fusion since 48 h. The capillary tube formed from one side of gel wall contacted to the other blood vessel sprout from the opposite side of gel wall and they met in the middle of the fibrin/collagen. Those capillary tubes were fused and a complete perfusable blood vessel was formed.

**Fig. S2** The formation of tubular and perfusable blood vessels was captured in a movie clip. The movie showed a vivid inner space of blood vessel including nucleus, microfilament, and tight junction between HUVECs in detail.

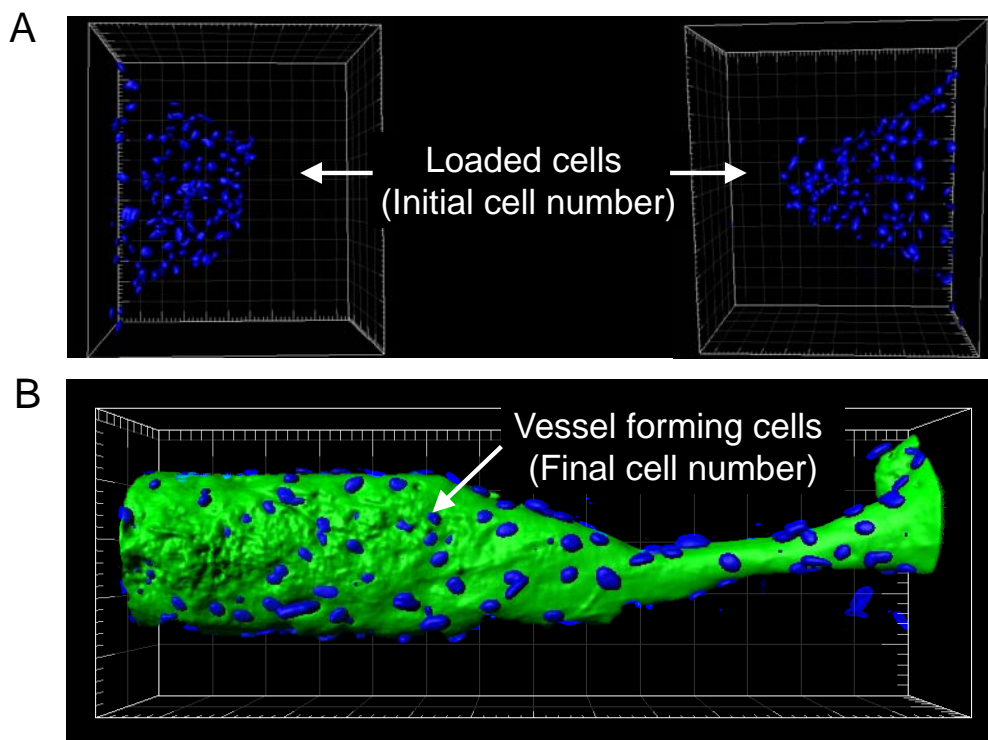

**Fig. S3** Method for counting loaded cells and vessel-forming cells. The cells were stained with DAPI after loading cells on a concave sidewall of gel and loaded cells were counted automatically using a

Supplementary Material (ESI) for Lab on a Chip  
This journal is © The Royal Society of Chemistry 2012

computer program. To count the number of vessel-forming cells, first FITC-dextran was perfused into blood vessel to confirm whether the blood vessel was entirely formed or not and then the cells counted by staining them with DAPI and using the computer program.

**Fig. S4** Flow of FITC-dextran through blood vessel was captured in a movie clip. We added FITC-dextran into the blood vessel filled with PBS and FITC-dextran was diffused and filled inside of blood vessel

**Fig. S5** Flow of RBCs which is stained with CellTracker<sup>TM</sup> red through the blood vessel.
